# Supplementary material
Source: PubMed Central journal article supplement (PMC4888959)
Supplement: NIHMS788959-supplement-Supp_Info.pdf [file NIHMS788959-supplement-Supp_Info.pdf]

1 **Supporting Information for**

2  
3 **Regulation of CsrB/C sRNA decay by EIIA<sup>Glc</sup> of the phosphoenolpyruvate:**  
4 **carbohydrate phosphotransferase system**

5  
6 **Yuanyuan Leng<sup>1</sup>, Christopher A. Vakulskas<sup>1</sup>, Tesfalem R. Zere<sup>1</sup>, Bradley S.**  
7 **Pickering<sup>2±</sup>, Paula I. Watnick<sup>2</sup>, Paul Babitzke<sup>3</sup>, and Tony Romeo<sup>1\*</sup>**

8  
9 <sup>1</sup> Department of Microbiology and Cell Science, University of Florida, Gainesville,  
10 FL 32611-0700, USA

11 <sup>2</sup> Division of Infectious Diseases, Boston Children's Hospital, Boston, MA 02115,  
12 USA

13 <sup>3</sup> Department of Biochemistry and Molecular Biology, Center for RNA Molecular  
14 Biology, Pennsylvania State University, University Park, PA 16802, USA

15 <sup>±</sup>Present Address: Canadian Food Inspection Agency, National Centre for  
16 Foreign Animal Disease Winnipeg, Manitoba, Canada R3E 3M4

20 **Supplementary experimental procedures**

21 *Gel mobility shift assay*

22 RNAs (CsrB, CsrC, *rpsT* and GlmZ) were synthesized and end-labeled as  
23 previously described (Suzuki *et al.*, 2006). RNAs were gel purified, suspended in  
24 TE buffer (10 mM Tris-HCl, pH 8.0, 1 mM EDTA) and renatured by heating to  
25 70°C for 5 min and slow cooling to room temperature. Binding reactions (10 µl)  
26 contained 10 mM Tris-HCl, pH7.5, 125 mM KCl, and 2 mM MgCl<sub>2</sub>, 32.5 ng of  
27 yeast RNA, 7.5% glycerol, 1 mM dithiothreitol (DTT), 4 U of RNase inhibitor  
28 (Ambion), 0.6nM CsrB RNA, purified MBP-tagged CsrD<sup>ΔTM</sup> and/or His-tagged  
29 EIIA<sup>Glc</sup> and 0.1 mg ml<sup>-1</sup> xylene cyanol. For competition studies, assays were  
30 carried out with unlabeled RNA competitors (CsrC, *rpsT* and GlmZ). Reaction  
31 mixtures were incubated for 30 min at 37°C to allow protein–RNA complex  
32 formation. Samples were then fractionated on 5% native Bis-Tris gels.  
33 Radioactive bands were visualized and quantified using a phosphorimager and  
34 Image Quant software.

35

36

37

38

39

40

41 **Supplementary figures**

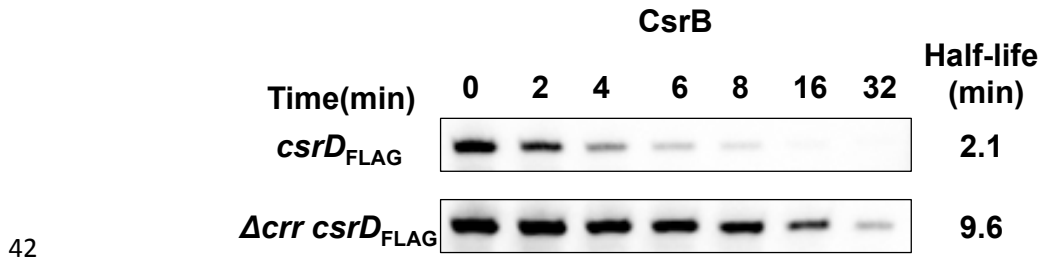

43 Figure S1. EIIA<sup>Glc</sup> stimulates CsrB decay in the MG1655 *csrD*<sub>FLAG</sub> strain.

44 Northern blots depicting the effect of EIIA<sup>Glc</sup> on CsrB decay in strains MG1655  
 45 *csrD*<sub>FLAG</sub> and MG1655  $\Delta$ *crr* *csrD*<sub>FLAG</sub>. Half-lives were determined as in Figure 1.

46

47

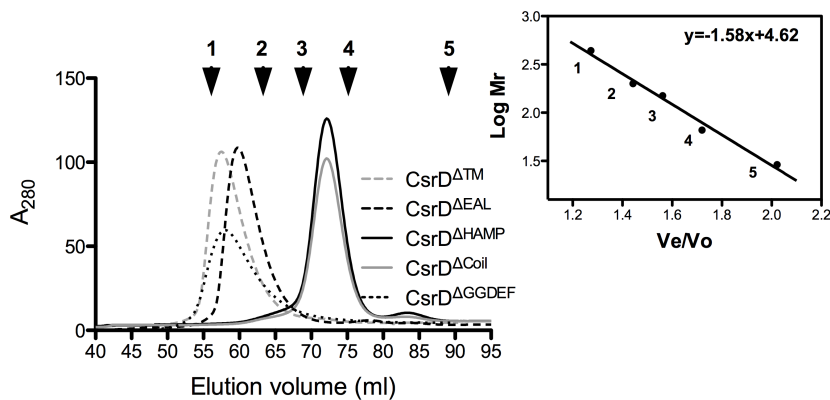

48

49 Figure S2. Gel filtration chromatography of CsrD variants.

50 Each CsrD variant (1 mg) was passed through a Superdex 200 column  
 51 (HiLoad<sup>TM</sup> 16/60, 120 ml). Arrows indicate elution volumes of molecular weight  
 52 markers used to calibrate the column (Experimental procedures).

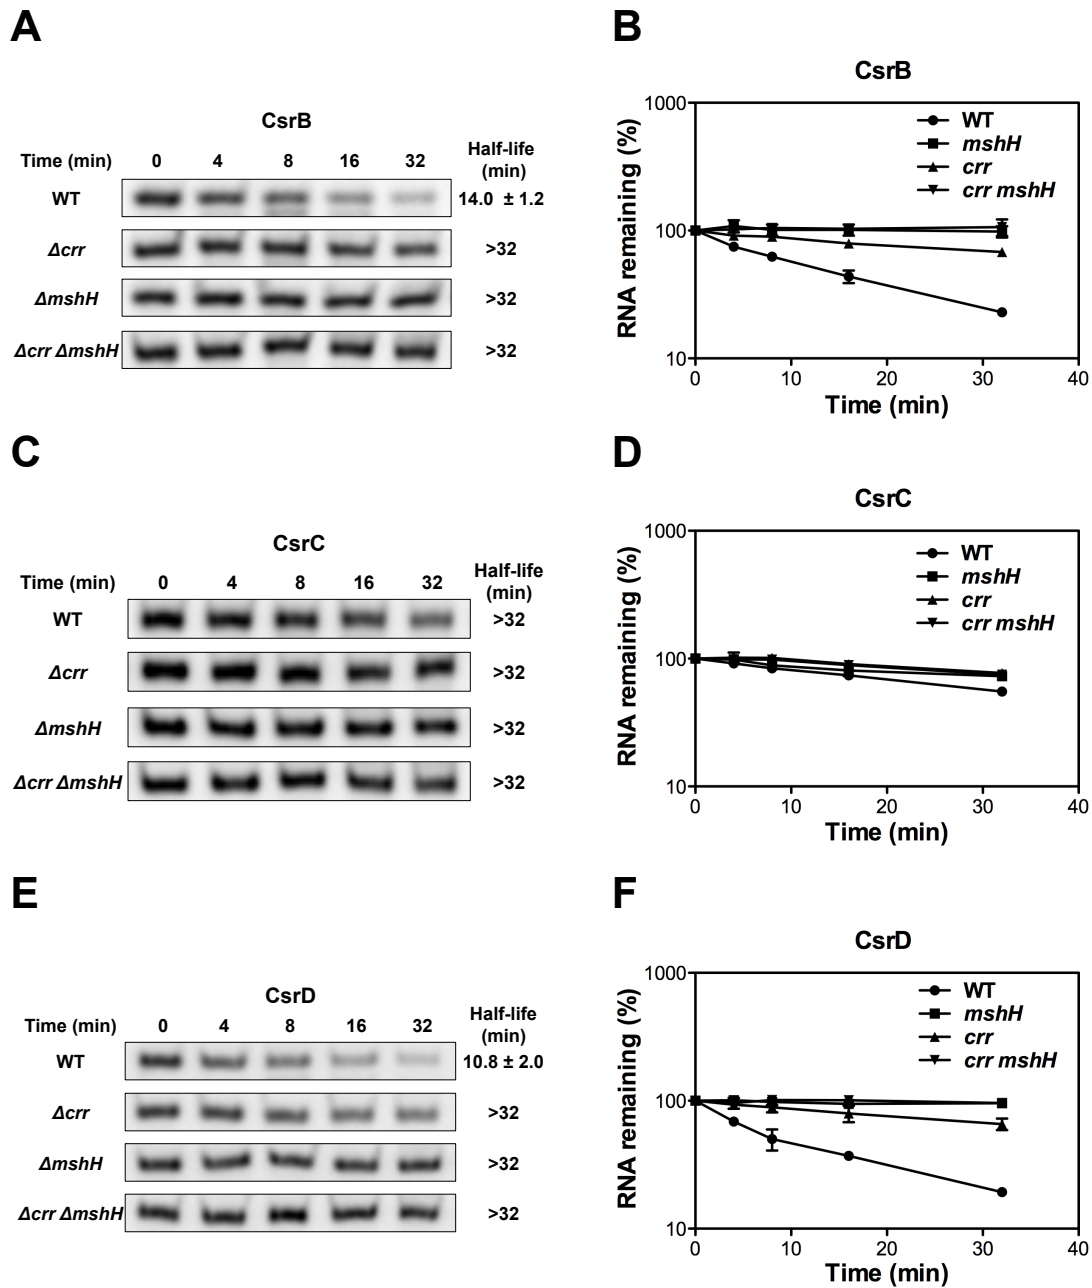

54

55 Figure S3. EIIA<sup>Glc</sup> and MshH (CsrD ortholog) affect CsrB and CsrD decay in *V.*  
 56 *cholerae*.

57 A, C and E. Decay rates of CsrB/C/D sRNAs were determined by Northern  
58 blotting, after rifampicin addition (time points indicated) to 27°C exponentially  
59 growing (OD<sub>600</sub> ~0.5) cultures of *V. cholerae* 01 El Tor (WT),  $\Delta crr$ ,  $\Delta mshH$  and  
60  $\Delta crr \Delta mshH$  strains. The RNA half-lives and standard derivations from duplicate  
61 experiments were determined as in Figure 1.

62 B, D and F. Quantification of signals obtained from two independent experiments,  
63 as presented in panels A, C and E. Standard deviations are indicated.

64

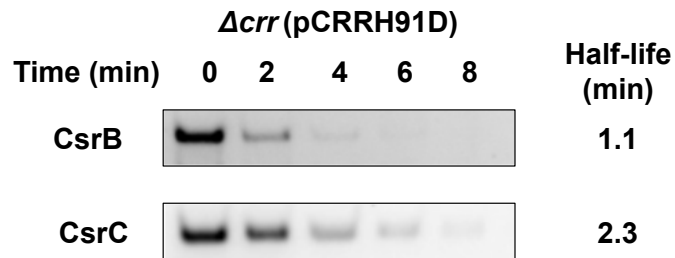

65

66 Figure S4. Decay of CsrB/C in a strain expressing EIIA<sup>Glc</sup>H91D is similar to that  
67 of EIIA<sup>Glc</sup> H91A.

68 Decay rates of CsrB/C were determined in the  $\Delta crr$  strain containing plasmid  
69 pCRRH91D, as described for the pCRRH91A-containing strain in Figure 1A and

70 C.

71

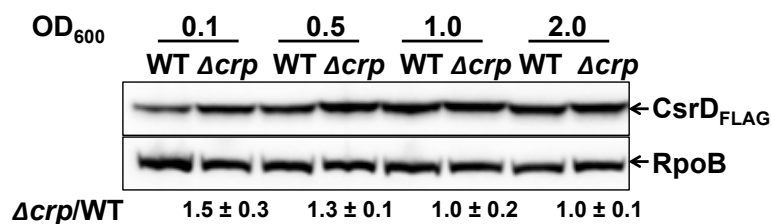

72

73 Figure S5. CRP has minimal or no effect on CsrD protein levels.

74 Western blots depicting effects of *crp* deletion on CsrD protein levels. RpoB was  
 75 used as loading control. CsrD protein levels in Δ*crp* relative to those in the wild-  
 76 type strain (WT) were given. Standard derivations from triplicate experiments are  
 77 indicated.

78

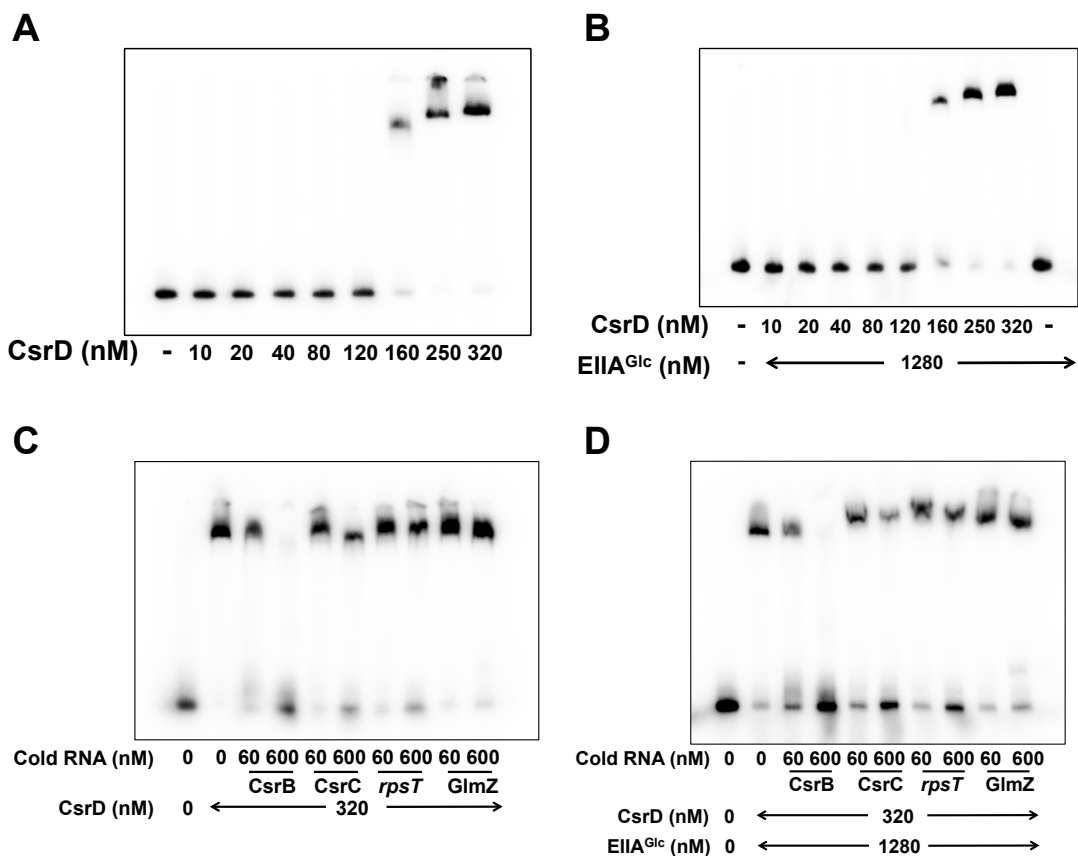

79

80 Figure S6. EIIA<sup>Glc</sup> has no effect on the binding of CsrD to CsrB RNA *in vitro*.

81 A and B. EMSA experiments were carried out with 0.6 nM labeled CsrB and

82 increasing concentrations of CsrD (0-320 nM) in the absence or presence of

83 EIIA<sup>Glc</sup>.

84 C and D. Competition assays were performed using 0.6 nM labeled CsrB with

85 indicated concentration of CsrD and EIIA<sup>Glc</sup> in the absence or presence of 100-

86 fold and 1,000-fold molar excess of unlabeled competitor sRNAs, CsrB, CsrC,

87 and GlmZ and mRNA, *rpsT*.

88

## 89 **Supplementary tables**

90 Table S1. Bacterial Strains

| Strain                          | Description                                                                               | Reference      |
|---------------------------------|-------------------------------------------------------------------------------------------|----------------|
| MG1655                          | Prototrophic E. coli K12                                                                  | Michael Cashel |
| MG1655 $\Delta crr$             | MG1655 with unmarked <i>crr</i> deletion                                                  | This study     |
| MG1655 $\Delta csrD$            | MG1655 with unmarked <i>csrD</i> deletion                                                 | This study     |
| MG1655 $\Delta crp$             | MG1655 with marked <i>crp</i> disruption-Cam <sup>r</sup>                                 | This study     |
| MG1655 $\Delta cyaA$            | MG1655 with marked <i>cyaA</i> deletion-Kan <sup>r</sup>                                  | This study     |
| MG1655 $\Delta crr \Delta csrD$ | MG1655 with unmarked <i>crr</i> deletion and marked <i>csrD</i> deletion-Kan <sup>r</sup> | This study     |

|                                                 |                                                                                              |                                 |
|-------------------------------------------------|----------------------------------------------------------------------------------------------|---------------------------------|
| MG1655 $\Delta crr \Delta crp$                  | MG1655 with unmarked <i>crr</i> deletion and marked <i>crp</i> disruption-Cam <sup>r</sup>   | This study                      |
| MG1655 $\Delta crr \Delta cyaA$                 | MG1655 with unmarked <i>crr</i> deletion and marked <i>cyaA</i> deletion-Kan <sup>r</sup>    | This study                      |
| MG1655 <i>csrD</i> <sub>FLAG</sub>              | MG1655 with in-frame, CTD 3X-FLAG tag at native <i>csrD</i> locus                            | This study                      |
| MG1655 $\Delta crr$ <i>csrD</i> <sub>FLAG</sub> | <i>csrD</i> <sub>FLAG</sub> allele introduced by transduction using P1vir - Kan <sup>r</sup> | This study                      |
| MG1655 $\Delta crp$ <i>csrD</i> <sub>FLAG</sub> | <i>csrD</i> <sub>FLAG</sub> allele introduced by transduction using P1vir - Kan <sup>r</sup> | This study                      |
| MG1655 <i>crr</i> <sub>FLAG</sub>               | MG1655 with in-frame, CTD 3X-FLAG tag at native <i>crr</i> locus                             | This study                      |
| MG1655 H91A                                     | MG1655 with a His91Ala exchange (CAC to GCC) at native <i>crr</i> locus                      | This study                      |
| MG1655 H91A <i>crr</i> <sub>FLAG</sub>          | <i>crr</i> <sub>FLAG</sub> allele introduced by transduction using P1vir                     | This study                      |
| BL21(DE3)                                       | Host for expression                                                                          | (Studier & Moffatt, 1986)       |
| DE5 $\alpha$                                    | Host for plasmid amplification                                                               | (Woodcock <i>et al.</i> , 1989) |
| PW1096                                          | <i>Vibrio cholerae</i> C6706str2                                                             | (Thelin & Taylor, 1996)         |
| PW1197                                          | PW1096 with in frame <i>mshH</i> deletion                                                    | This study                      |
| PW1198                                          | PW1096 with in frame <i>crr</i> deletion                                                     | This study                      |
| PW1207                                          | PW1096 with in fram <i>mshH</i>                                                              | This study                      |



---

and *crr* deletions

---

91

92

93 Table S2. Plasmids and related primers

| Name     | Description                                                                                  | Relevant Primers | Reference                      |
|----------|----------------------------------------------------------------------------------------------|------------------|--------------------------------|
| pBR322   | Cloning vector - Amp <sup>r</sup> Tet <sup>r</sup>                                           | N/A              | (Bolivar <i>et al.</i> , 1977) |
| pCRR     | pBR322 derivative carrying <i>crr</i> gene between EcoRI and HindIII sites- Amp <sup>r</sup> | P1/P2            | This study                     |
| pCRRH91A | pCRR derivative carrying <i>crr</i> with a His91Ala exchange (CAC to GCC)                    | P1/P17/P2        | This study                     |
| pCRRH91D | pCRR derivative carrying <i>crr</i> with a His91Asp exchange (CAC to GAC)                    | P1/P19/P2        | This study                     |
| pBYH4    | pBR322 derivative carrying <i>csrD</i> gene in EcoRI site- Amp <sup>r</sup>                  | N/A              | (Suzuki <i>et al.</i> , 2006)  |
| pET24CRR | pET24a derivative carrying <i>crr</i> gene between NdeI and XhoI sites                       | P3 /P4           | This study                     |
| pΔTM     | pMAL-c5x derivative carrying DNA encoding 156-646 aa of CsrD between NcoI and EcoRI sites    | P5/P10           | This study                     |
| pΔEAL    | pMAL-c5x derivative carrying DNA encoding 156-385 aa of CsrD between NcoI and EcoRI          | P6/P7            | This study                     |

---

|          | sites                                                                                                  |                      |                             |
|----------|--------------------------------------------------------------------------------------------------------|----------------------|-----------------------------|
| pΔGGDEF  | pMAL-c5x derivative carrying DNA encoding 156-223 and 393-646 aa of CsrD between NcoI and EcoRI sites  | P6/P8 and P9/P10     | This study                  |
| pΔHAMP   | pMAL-c5x derivative carrying DNA encoding 192-646 aa of CsrD between NcoI and EcoRI sites              | P11/P10              | This study                  |
| pΔcoil   | pMAL-c5x derivative carrying DNA encoding 156-199 and 220-646 aa of CsrD between NcoI and EcoRI sites  | P6/P12 and P13/P10   | This study                  |
| pEAL     | pMAL-c5x derivative carrying DNA encoding 393-646 aa of CsrD between NcoI and EcoRI sites              | P14/P10              | This study                  |
| pKOV     | Vector for homologous recombination                                                                    | N/A                  | (Link <i>et al.</i> , 1997) |
| pKOVH91A | pKOV derivative carrying <i>crr</i> with a His91Ala exchange (CAC to GCC) between NotI and BamHI sites | P15/P17 and P18/ P16 | This study                  |

94

95

96 Table S3. Primers

| Primer # | Sequence (5'-3') | Function |
|----------|------------------|----------|
|----------|------------------|----------|

---

|     |                                                                                      |                                                              |
|-----|--------------------------------------------------------------------------------------|--------------------------------------------------------------|
| P1  | CAGTACCAGGAATTCTTTACACTTTAT<br>GCTTCCGGCTCGTATATTGTGTGGAA<br>GAAATAATTTTGTTAACTTTAAG | pCRR and pH91D<br>construction                               |
| P2  | CAGGACCATAAGCTTTTACTTCTTGAT<br>GCGGATAACCGGGGT                                       | pCRR construction                                            |
| P3  | ACATGATCTCATATGGGTTTGTTCGAT<br>AACTGAAATCTC                                          | pET24CRR<br>construction                                     |
| P4  | ACATGATCTCTCGAGCTTCTTGATGCG<br>GATAACCGGGGT                                          | pET24CRR<br>construction                                     |
| P5  | CCGATTCCATGGGCCGCTGGTTACAA<br>CGGCAACTTGCCG                                          | pDTM construction                                            |
| P6  | CATGCCATGGGCCGCTGGTTACAACG<br>GCAACTTGC                                              | pDEAL, pDGGDEF<br>and pDcoil<br>construction                 |
| P7  | ACCGGAATTCTTAGTAAATAGCCCAG<br>CTATTGCCGC                                             | pDEAL construction                                           |
| P8  | AACATTACCGCGTCCATAAGAGCGGA<br>TCAG                                                   | pDGGDEF<br>construction                                      |
| P9  | CTGATCCGCTCTTATGGACGCGGTAA<br>TGTT                                                   | pDGGDEF<br>construction                                      |
| P10 | ACCGGAATTCTTAAACCGAGTATCTTT<br>GTGAATAT                                              | pDTM, pDGGDEF,<br>pDHAMP, pDcoil<br>and pEAL<br>construction |
| P11 | CATGCCATGGGCCCGCCAGAACCA<br>GCAGTGC                                                  | pDHAMP<br>construction                                       |
| P12 | GGCGGCATAAGAGCGGATCAGCGCA<br>CTGCTGGTTCT                                             | pDcoil construction                                          |
| P13 | AGAACCAGCAGTGCGCTGATCCGCTC<br>TTATGCCGCC                                             | pDcoil construction                                          |
| P14 | CATGCCATGGGCCGGACGCGGTAATGT                                                          | pEAL construction                                            |

---

---

| TCGCTGGCGTA |                                                                      |                                                    |
|-------------|----------------------------------------------------------------------|----------------------------------------------------|
| P15         | ATAAGAATGCGGCCGCAAAGATCTGC<br>CAGCTATTACGCTGG                        | pKOVH91A<br>construction                           |
| P16         | CGCGGATCCTGATAGCCGATTTGACT<br>GCCAGAAT                               | pKOVH91A<br>construction                           |
| P17         | GGTGTGATACCGAAGGCGACGAACA<br>GTTCAAC                                 | pCRRH91A and<br>pKOVH91A<br>construction           |
| P18         | GTTGAACTGTTTCGTCGCCTTCGGTAT<br>CGACACC                               | pKOVH91A<br>construction                           |
| P19         | GGTGTGATACCGAAGTCGACGAACA<br>GTTCAAC                                 | pCRRH91D<br>construction                           |
| S1          | CGTAACCGTGGGTGAAACCCCGGTTA<br>TCCGCATCAAGAAGGACTACAAAGAC<br>CATGACGG | MG1655 <i>crr</i> <sub>FLAG</sub><br>construction  |
| S2          | AAATGGCGCCGATGGGCGCCATTTTT<br>CACTGCGGCAAGAACATATGAATATC<br>CTCCTTAG | MG1655 <i>crr</i> <sub>FLAG</sub><br>construction  |
| S3          | TGATACTAACGTGAAAAATATTCACA<br>AAGATACTCGGTTGACTACAAAGACC<br>ATGACGG  | MG1655 <i>csrD</i> <sub>FLAG</sub><br>construction |
| S4          | AGCGCGCATTATTCTACGTGAAAACG<br>GATTAACGGCAGGCATATGAATATC<br>CTCCTTAG  | MG1655 <i>CsrD</i> <sub>FLAG</sub><br>construction |
| R1          | GTAATACGACTCACTATAGTCGACAG<br>GGAGTCAGACAAC                          | RNA CsrB synthesis                                 |
| R2          | AAAAAAGGGAGCACTGTATTCACAG<br>CGCTCCCGGTTTCGTTTCGCAG                  | RNA CsrB synthesis                                 |
| R3          | GTAATACGACTCACTATAGGATAGAG<br>CGAGGACGCTAACAGGAAC                    | RNA CsrC synthesis                                 |
| R4          | AAGAAAAAAGGCGACAGATTACTCTG                                           | RNA CsrC synthesis                                 |

---

---

|      | TCGCCTTTTTTCCTGACTC                               |                                            |
|------|---------------------------------------------------|--------------------------------------------|
| R5   | GTAATACGACTCACTATAGGCCTTTGA<br>ATTGTCCATATAGAACAC | RNA <i>rpsT</i> synthesis                  |
| R6   | AAAAAAACCCGCTTGCGCGGGCTTTT<br>TCACAAAGCTTCAGC     | RNA <i>rpsT</i> synthesis                  |
| R7   | TAATACGACTCACTATAGGGTAGATGC<br>TCATTCCATCTC       | RNA GlmZ synthesis                         |
| R8   | AAAAAAACGCCTGCTCTTATTACGGAG<br>CAGGCGTTAAAAC      | RNA GlmZ synthesis                         |
| RP1  | TAATACGACTCACTATAGGGTAAAAGG<br>TGCTCCCTGCATCTAATC | <i>V. cholerae</i> CsrB<br>probe synthesis |
| RP2  | TGGTGATCTTCAGGAAGAAGAATCG                         | <i>V. cholerae</i> CsrB<br>probe synthesis |
| RP3  | TAATACGACTCACTATAGGGATCCTTT<br>CAGCGAACTCCGAGCATC | <i>V. cholerae</i> CsrC<br>probe synthesis |
| RP4  | CAGGATGAGAAGTGGTGAGGATGAC                         | <i>V. cholerae</i> CsrC<br>probe synthesis |
| RP5  | TAATACGACTCACTATAGGGCAATCCC<br>GCTACTAATAGGTGCTCC | <i>V. cholerae</i> CsrD<br>probe synthesis |
| RP6  | CAAGGATTGGTCATCTTCAGGACGA                         | <i>V. cholerae</i> CsrD<br>probe synthesis |
| RP7  | GTAATACGACTCACTATAGGTTTCGTTT<br>CGCAGCATTCCAG     | <i>E. coli</i> CsrB probe<br>synthesis     |
| RP8  | GCGTTAAAGGACACCTCCAGG                             | <i>E. coli</i> CsrB probe<br>synthesis     |
| RP9  | GTAATACGACTCACTATAGGTCTTACA<br>ATCCTTGCAGGC       | <i>E. coli</i> CsrC probe<br>synthesis     |
| RP10 | GAGGACGCTAACAGGAACAATG                            | <i>E. coli</i> CsrC probe<br>synthesis     |

---

97

98

99 Table S4. Molecular weight of CsrD in solution

| Protein                | Molecular Mass (kDa)    |                           | Quaternary structure <sup>c</sup> |
|------------------------|-------------------------|---------------------------|-----------------------------------|
|                        | Calculated <sup>a</sup> | Experimental <sup>b</sup> |                                   |
| CsrD <sup>ΔTM</sup>    | 99.3                    | 359                       | Tetramer                          |
| CsrD <sup>ΔHAMP</sup>  | 95.1                    | 107                       | Monomer                           |
| CsrD <sup>ΔCoil</sup>  | 97.0                    | 107                       | Monomer                           |
| CsrD <sup>ΔGGDEF</sup> | 80.3                    | 344                       | Tetramer                          |
| CsrD <sup>ΔEAL</sup>   | 69.4                    | 296                       | Tetramer                          |

a. Molecular mass of the protein calculated from the primary sequence.

b. Molecular mass determined using size exclusion chromatography.

c. Deduced quaternary structure.

100

101

102 **References**

- 103 Bolivar, F., R.L. Rodriguez, P.J. Greene, M.C. Betlach, H.L. Heyneker, H.W.  
104 Boyer, J.H. Crosa & S. Falkow, (1977) Construction and characterization  
105 of new cloning vehicles. II. A multipurpose cloning system. *Gene* **2**: 95-  
106 113.
- 107 Link, A.J., D. Phillips & G.M. Church, (1997) Methods for generating precise  
108 deletions and insertions in the genome of wild-type *Escherichia coli*:  
109 application to open reading frame characterization. *J Bacteriol* **179**: 6228-  
110 6237.
- 111 Studier, F.W. & B.A. Moffatt, (1986) Use of bacteriophage T7 RNA polymerase to  
112 direct selective high-level expression of cloned genes. *J Mol Biol* **189**:  
113 113-130.
- 114 Suzuki, K., P. Babitzke, S.R. Kushner & T. Romeo, (2006) Identification of a  
115 novel regulatory protein (CsrD) that targets the global regulatory RNAs  
116 CsrB and CsrC for degradation by RNase E. *Genes Dev* **20**: 2605-2617.
- 117 Thelin, K.H. & R.K. Taylor, (1996) Toxin-coregulated pilus, but not mannose-  
118 sensitive hemagglutinin, is required for colonization by *Vibrio cholerae* O1  
119 El Tor biotype and O139 strains. *Infect Immun* **64**: 2853-2856.
- 120 Woodcock, D.M., P.J. Crowther, J. Doherty, S. Jefferson, E. DeCruz, M. Noyer-  
121 Weidner, S.S. Smith, M.Z. Michael & M.W. Graham, (1989) Quantitative  
122 evaluation of *Escherichia coli* host strains for tolerance to cytosine  
123 methylation in plasmid and phage recombinants. *Nucleic Acids Res* **17**:  
124 3469-3478.

125

126
